# Supplementary material
Source: publisher figshare collection journal article supplement (https://tandf.figshare.com/articles/dataset/_/5092159)
Supplement: Supplementary file 1 [file 1]

# Appendix A: Experiment 1 [and 2](#) material

|                      |                                     | List1         |                            |                |                                     |               | List2                   |      |                |
|----------------------|-------------------------------------|---------------|----------------------------|----------------|-------------------------------------|---------------|-------------------------|------|----------------|
|                      |                                     | Determiner    | Noun                       | Co-occurrence* |                                     |               | Determiner              | Noun | Co-occurrence* |
| Singular Oriented*** | Gender-marked Determiner (singular) | le            | Teint 'complexion'         | 46             | Gender-unmarked Determiner (plural) | les           | Teints 'complexions'    | 0    |                |
|                      |                                     | une           | Taille 'size'              | 78             |                                     | des           | Tailles 'sizes'         | 7    |                |
|                      |                                     | le            | Vase 'vase'                | 113            |                                     | des           | Vases 'vases'           | 9    |                |
|                      |                                     | la            | Lampe 'lamp'               | 364            |                                     | les           | Lampes 'lamps'          | 44   |                |
|                      |                                     | un            | Bar 'bar'                  | 906            |                                     | les           | Bars 'bars'             | 185  |                |
|                      |                                     | le            | Séjour 'stay'              | 47             |                                     | les           | Séjours 'stays'         | 0    |                |
|                      |                                     | une           | Humeur 'mood'              | 47             |                                     | des           | Humeurs 'moods'         | 7    |                |
|                      |                                     | une           | Cuillère 'spoon'           | 98             |                                     | les           | Cuillères 'spoons'      | 8    |                |
|                      |                                     | un            | Gagnant 'winner'           | 147            |                                     | des           | Gagnants 'winners'      | 31   |                |
|                      |                                     | une           | Légende 'legend'           | 361            |                                     | les           | Légendes 'legends'      | 54   |                |
|                      |                                     | le            | Placard 'cupboard'         | 446            |                                     | des           | Placards 'cupboards'    | 19   |                |
|                      |                                     | la            | Façon 'way'                | 1705           |                                     | les           | Façons 'ways'           | 48   |                |
|                      |                                     | un            | Tablier 'apron'            | 39             |                                     | les           | Tabliers 'aprons'       | 8    |                |
|                      |                                     | un            | Capitaine 'captain'        | 159            |                                     | des           | Capitaines 'captains'   | 12   |                |
|                      |                                     | Mean = 325.43 |                            |                |                                     | Mean = 30.86  |                         |      |                |
|                      | Gender-unmarked Determiner (plural) | les           | Faces 'sides'              | 10             | Gender-marked Determiner (singular) | une           | Face 'side'             | 26   |                |
|                      |                                     | des           | Diabes 'devils'            | 17             |                                     | un            | Diable 'devil'          | 59   |                |
|                      |                                     | des           | Plages 'beaches'           | 30             |                                     | une           | Plage 'beach'           | 151  |                |
|                      |                                     | des           | Vestes 'jackets'           | 22             |                                     | la            | Veste 'jacket'          | 264  |                |
|                      |                                     | les           | Vols 'flights'             | 125            |                                     | le            | Vol 'flight'            | 869  |                |
|                      |                                     | des           | Sécheresses 'droughts'     | 3              |                                     | la            | Sécheresse 'drought'    | 39   |                |
|                      |                                     | des           | Blousons 'jackets'         | 8              |                                     | le            | Blouson 'jacket'        | 47   |                |
|                      |                                     | les           | Agneaux 'lambs'            | 16             |                                     | un            | Agneau 'lamb'           | 83   |                |
|                      |                                     | des           | Pensions 'pensions'        | 11             |                                     | une           | Pension 'pension'       | 154  |                |
|                      |                                     | les           | Tableaux 'blackboards'     | 126            |                                     | le            | Tableau 'blackboard'    | 674  |                |
|                      |                                     | des           | Manières 'ways'            | 80             |                                     | une           | Manière 'way'           | 498  |                |
|                      |                                     | les           | Lendemain 'tomorrows'      | 10             |                                     | le            | Lendemain 'tomorrow'    | 1153 |                |
|                      |                                     | des           | Manivelles 'cranks'        | 0              |                                     | la            | Manivelle 'crank'       | 20   |                |
|                      |                                     | les           | Caractères 'personalities' | 17             |                                     | le            | Caractère 'personality' | 117  |                |
|                      |                                     | Mean = 33.93  |                            |                |                                     | Mean = 296.71 |                         |      |                |
| Plural Oriented***   | Gender-marked Determiner (singular) | une           | Nouille 'noodle'           | 15             | Gender-unmarked Determiner (plural) | des           | Nouilles 'noodles'      | 52   |                |
|                      |                                     | la            | Frite 'french frie'        | 16             |                                     | des           | Frites 'french fries'   | 313  |                |
|                      |                                     | la            | Dent 'tooth'               | 103            |                                     | les           | Dents 'teeth'           | 914  |                |
|                      |                                     | un            | Astre 'star'               | 0              |                                     | les           | Astres 'stars'          | 23   |                |
|                      |                                     | une           | Cendre 'ash'               | 4              |                                     | les           | Cendres 'ashes'         | 156  |                |
|                      |                                     | le            | Cheveu 'hair'              | 41             |                                     | les           | Cheveux 'hair'          | 1720 |                |
|                      |                                     | la            | Chaussette 'sock'          | 22             |                                     | des           | Chaussettes 'socks'     | 141  |                |
|                      |                                     | le            | Collant 'tights'           | 7              |                                     | des           | Collants 'hose'         | 40   |                |
|                      |                                     | un            | Volet 'shutter'            | 5              |                                     | les           | Volet 'shutters'        | 90   |                |
|                      |                                     | le            | Bonbon 'candy'             | 9              |                                     | des           | Bonbons 'candies'       | 438  |                |
|                      |                                     | la            | Chaussure 'shoe'           | 102            |                                     | des           | Chaussures 'shoes'      | 486  |                |
|                      |                                     | une           | Narine 'nostril'           | 4              |                                     | les           | Narines 'nostrils'      | 43   |                |
|                      |                                     | la            | Cacahuète 'peanut'         | 9              |                                     | des           | Cacahuètes 'peanuts'    | 99   |                |
|                      |                                     | un            | Epinard 'spinach'          | 0              |                                     | des           | Epinards 'spinachs'     | 32   |                |
|                      |                                     | Mean = 24.07  |                            |                |                                     | Mean = 324.79 |                         |      |                |
|                      | Gender-unmarked Determiner (plural) | des           | Fleurs 'flowers'           | 1033           | Gender-marked Determiner (singular) | la            | Fleur 'flower'          | 211  |                |
|                      |                                     | les           | Sourcils 'brows'           | 86             |                                     | un            | Sourcil 'eyebrow'       | 16   |                |
|                      |                                     | des           | Haricots 'beans'           | 150            |                                     | le            | Haricot 'bean'          | 10   |                |
|                      |                                     | des           | Lunettes 'glasses'         | 313            |                                     | une           | Lunette 'glass'         | 22   |                |
|                      |                                     | les           | Etoiles 'stars'            | 689            |                                     | une           | Etoile 'star'           | 328  |                |
|                      |                                     | les           | Toilettes 'toilets'        | 1045           |                                     | une           | Toilette 'toilet'       | 20   |                |
|                      |                                     | des           | Paillettes 'flecks'        | 38             |                                     | la            | Paillette 'fleck'       | 0    |                |
|                      |                                     | des           | Chips 'crisps'             | 121            |                                     | la            | Chip 'crisp'            | 2    |                |
|                      |                                     | des           | Pois 'peas'                | 24             |                                     | le            | Pois 'pea'              | 8    |                |
|                      |                                     | des           | Poux 'lice'                | 88             |                                     | le            | Poux 'louse'            | 1    |                |
|                      |                                     | des           | Légumes 'vegetables'       | 157            |                                     | le            | Légume 'vegetable'      | 12   |                |
|                      |                                     | les           | Lèvres 'lips'              | 333            |                                     | une           | Lèvre 'lip'             | 10   |                |
|                      |                                     | les           | Talons 'heels'             | 38             |                                     | un            | Talon 'heel'            | 7    |                |
|                      |                                     | les           | Castagnettes 'castanets'   | 9              |                                     | une           | Castagnette 'castanet'  | 0    |                |
|                      |                                     | Mean = 294.57 |                            |                |                                     | Mean = 46.21  |                         |      |                |

\*Co-occurrence frequency of determiner-noun sequences per 50,4 million (LEXIQUE database, New et al., 2001).

\*\*Singular-oriented noun = det.-noun co-occurrence frequency is higher with the singular determiner than with the plural determiner.

\*\*\*Plural-oriented noun = det.-noun co-occurrence frequency is higher with the plural determiner than with the singular determiner.
