# Supplementary material
Source: publisher figshare collection journal article supplement (https://tandf.figshare.com/articles/dataset/_/5092159)
Supplement: Supplementary file 2 [file 1]

## Appendix B: Experiment 3a and 3b material

|                     |                                     | List1         |                           |                | List2                               |               |                            |     |
|---------------------|-------------------------------------|---------------|---------------------------|----------------|-------------------------------------|---------------|----------------------------|-----|
|                     |                                     | Determiner    | Noun                      | Co-occurrence* | Determiner                          | Noun          | Co-occurrence*             |     |
| Singular Oriented** | Gender-marked Determiner (singular) | une           | Source ‘source’           | 299            | Gender-unmarked Determiner (plural) | les           | Sources ‘sources’          | 61  |
|                     |                                     | un            | Diable ‘devil’            | 59             |                                     | des           | Diables ‘devils’           | 17  |
|                     |                                     | le            | Placard ‘cupboard’        | 446            |                                     | des           | Placards ‘cupboards’       | 19  |
|                     |                                     | un            | Panier ‘basket’           | 154            |                                     | les           | Paniers ‘baskets’          | 21  |
|                     |                                     | une           | Manière ‘way’             | 498            |                                     | les           | Manières ‘ways’            | 59  |
|                     |                                     | la            | Sécheresse ‘drought’      | 39             |                                     | des           | Sécheresses ‘droughts’     | 3   |
|                     |                                     | un            | Dortoir ‘dorm’            | 28             |                                     | des           | Dortoirs ‘dorms’           | 11  |
|                     |                                     | la            | Panique ‘panic’           | 298            |                                     | des           | Paniques ‘panics’          | 3   |
|                     |                                     | un            | Caractère ‘personality’   | 63             |                                     | les           | Caractères ‘personalities’ | 17  |
|                     |                                     | une           | Guitare ‘guitar’          | 96             |                                     | les           | Guitares ‘guitars’         | 11  |
|                     |                                     | la            | Réussite ‘success’        | 116            |                                     | les           | Réussites ‘successes’      | 3   |
|                     |                                     | Mean = 190.55 |                           |                |                                     | Mean =20.45   |                            |     |
|                     | Gender-unmarked Determiner (plural) | des           | Vestes ‘jackets’          | 22             | Gender-marked Determiner (singular) | la            | Veste ‘jacket’             | 264 |
|                     |                                     | des           | Plages ‘beaches’          | 30             |                                     | une           | Plage ‘beach’              | 151 |
|                     |                                     | les           | Cliniques ‘clinics’       | 16             |                                     | la            | Clinique ‘clinic’          | 439 |
|                     |                                     | les           | Tenues ‘dresses’          | 27             |                                     | une           | Tenue ‘dress’              | 154 |
|                     |                                     | les           | Chapeaux ‘hats’           | 66             |                                     | le            | Chapeau ‘hat’              | 490 |
|                     |                                     | des           | Triumphes ‘triumphs’      | 3              |                                     | le            | Triomphe ‘triumph’         | 54  |
|                     |                                     | les           | Jeuneses ‘youthfulness’   | 7              |                                     | une           | Jeunesse ‘youthfulness’    | 26  |
|                     |                                     | les           | Victoires ‘victories’     | 16             |                                     | une           | Victoire ‘victorie’        | 207 |
|                     |                                     | les           | Cathédrales ‘cathedrals’  | 6              |                                     | la            | Cathédrale ‘cathedral’     | 83  |
|                     |                                     | des           | Gagnants ‘winners’        | 31             |                                     | un            | Gagnant ‘winner’           | 147 |
|                     |                                     | des           | Territoires ‘territories’ | 37             |                                     | le            | Territoire ‘territory’     | 198 |
|                     |                                     | Mean = 23.73  |                           |                |                                     | Mean = 201.18 |                            |     |
| Plural Oriented***  | Gender-marked Determiner (singular) | une           | Lèvre ‘lip’               | 10             | Gender-unmarked Determiner (plural) | les           | Lèvres ‘lips’              | 333 |
|                     |                                     | le            | Symptôme ‘symptom’        | 22             |                                     | les           | Symptômes ‘symptoms’       | 195 |
|                     |                                     | le            | Touriste ‘traveller’      | 9              |                                     | les           | Touristes ‘travellers’     | 150 |
|                     |                                     | la            | Chaussure ‘shoe’          | 102            |                                     | des           | Chaussures ‘shoes’         | 486 |
|                     |                                     | un            | Soulier ‘shoe’            | 7              |                                     | des           | Souliers ‘shoes’           | 43  |
|                     |                                     | une           | Paupière ‘eyelid’         | 1              |                                     | les           | Paupières ‘eyelids’        | 37  |
|                     |                                     | le            | Bonbon ‘candy’            | 9              |                                     | des           | Bonbons ‘candies’          | 438 |
|                     |                                     | la            | Statistique ‘statistics’  | 5              |                                     | les           | Statistiques ‘statistics’  | 119 |
|                     |                                     | une           | Troupe ‘troop’            | 75             |                                     | les           | Troupes ‘troops’           | 274 |
|                     |                                     | la            | Particule ‘particle’      | 4              |                                     | des           | Particules ‘particles’     | 58  |
|                     |                                     | un            | Sourcil ‘eyebrow’         | 16             |                                     | les           | Sourcils ‘eyebrows’        | 86  |
|                     |                                     | Mean = 23.64  |                           |                |                                     | Mean = 201.73 |                            |     |
|                     | Gender-unmarked Determiner (plural) | des           | Légumes ‘vegetables’      | 157            | Gender-marked Determiner (singular) | le            | Légume ‘vegetable’         | 12  |
|                     |                                     | des           | Chaussettes ‘socks’       | 141            |                                     | la            | Chaussette ‘sock’          | 22  |
|                     |                                     | des           | Cheveux ‘hair’            | 493            |                                     | le            | Cheveu ‘hair’              | 41  |
|                     |                                     | les           | Narines ‘nostrils’        | 43             |                                     | une           | Narine ‘nostril’           | 4   |
|                     |                                     | les           | Collants ‘tights’         | 32             |                                     | le            | Collant ‘tight’            | 7   |
|                     |                                     | les           | Vêtements ‘clothes’       | 415            |                                     | le            | Vêtement ‘clothe’          | 15  |
|                     |                                     | des           | Nouilles ‘noodles’        | 52             |                                     | une           | Nouille ‘noodle’           | 15  |
|                     |                                     | des           | Lunettes ‘glasses’        | 313            |                                     | une           | Lunette ‘glass’            | 22  |
|                     |                                     | les           | Cendres ‘ashes’           | 156            |                                     | une           | Cendre ‘ash’               | 4   |
|                     |                                     | des           | Cacahuètes ‘peanuts’      | 99             |                                     | la            | Cacahuète ‘peanut’         | 9   |
|                     |                                     | les           | Documents ‘documents’     | 274            |                                     | le            | Document ‘document’        | 90  |
|                     |                                     | Mean = 197.73 |                           |                |                                     | Mean = 21.91  |                            |     |

\*Co-occurrence frequency of determiner-noun sequences per 50,4 million (LEXIQUE database, New et al., 2001).

\*\*Singular-oriented noun = det.-noun co-occurrence frequency is higher with the singular determiner than with the plural determiner.

\*\*\*Plural-oriented noun = det.-noun co-occurrence frequency is higher with the plural determiner than with the singular determiner.
